# Supplementary material for: κ-opioid receptor stimulation alleviates rat vascular smooth muscle cell calcification via PFKFB3-lactate signaling
Source: Aging (Albany NY). 2021 May 20;13(10):14355–71. doi: 10.18632/aging.203050 (PMC8202865; doi:10.18632/aging.203050)
Supplement: Supplementary Figures [file aging-13-203050-s001.pdf]

## SUPPLEMENTARY FIGURES

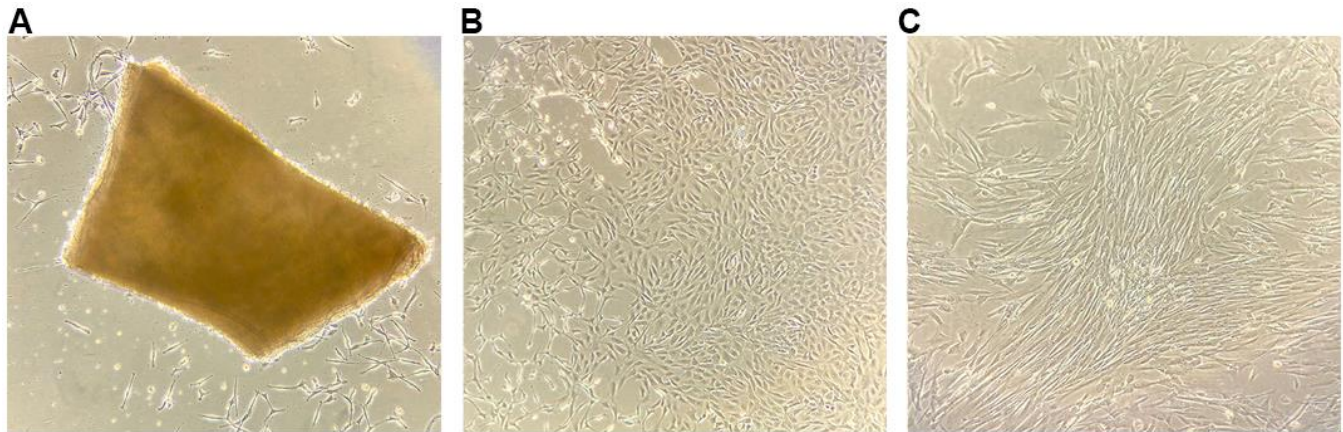

**Supplementary Figure 1. Evaluation of VSMCs morphology in rat thoracic aorta.** The isolated rat thoracic aorta vascular tissue block was inoculated and cultured. After 2-4 days, the cells could be seen crawling out of the edge. After 6-10 days of culture, the cells grew rapidly, spreading in a spindle shape, and fused into pieces. Passage after reaching 80% density, the characteristic "peak-valley" phenomenon of smooth muscle cells can be seen during the growth process. (A) VSMCs crawled out of the tissue block. (B) VSMCs fusion after 6-10 days. Quantitative analysis of RUNX2 expression. (C) Peak-valley phenomenon. (magnification:  $\times 40$ ).

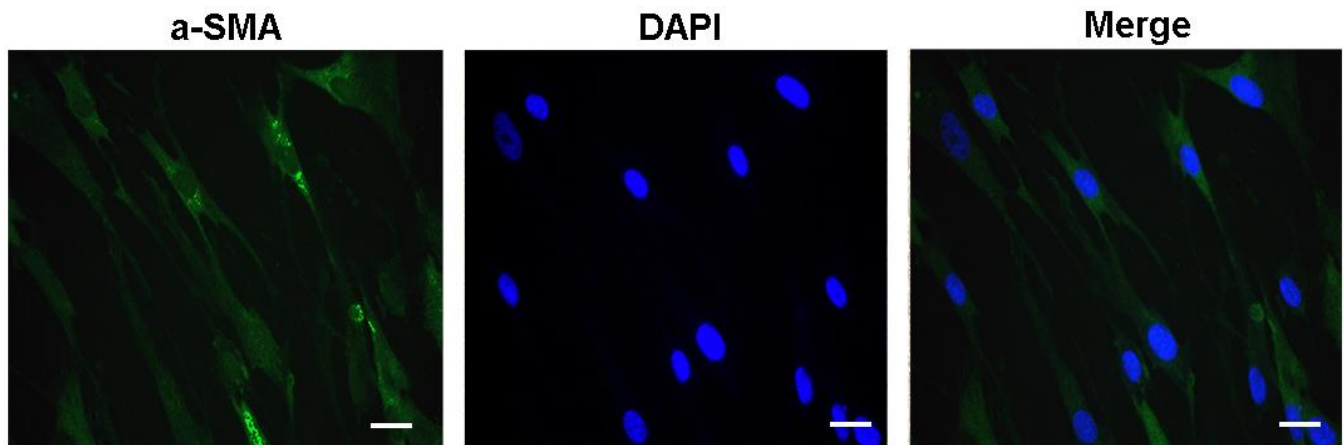

**Supplementary Figure 2. Identification of vascular smooth muscle cells (VSMCs).** Expression of  $\alpha$ -SMA in VSMCs was determined using immunofluorescence (magnification:  $\times 400$ ). VSMCs at passage 6 were used for smooth muscle-specific protein ( $\alpha$ -SMA) immunofluorescence staining and the result was obtained from a confocal microscopy. A large number of actin filaments parallel to the long axis (green fluorescence) in the cytoplasm was observed and regarded as  $\alpha$ -SMA-positive cells. The nuclei were stained with DAPI. The percentage of  $\alpha$ -SMA positive cells was more than 95%. Scale bar =  $20\mu\text{m}$ .
